# Supplementary material for: Mode switching of active droplets in macromolecular solutions
Source: Royal Society of Chemistry journal article supplement (doi:10.1039/d3sm00301a), 2023-01-01
Supplement: d3sm00301a1.pdf [file d3sm00301a1.pdf]

# Mode switching of active droplets in macromolecular solutions

Prateek Dwivedi, Atishay Shrivastava, Dipin Pillai and Rahul Mangal\*

*Department of Chemical Engineering, Indian Institute of Technology Kanpur, 208016, India*

\*Corresponding author. Email: mangalr@iitk.ac.in

## Supplementary Information

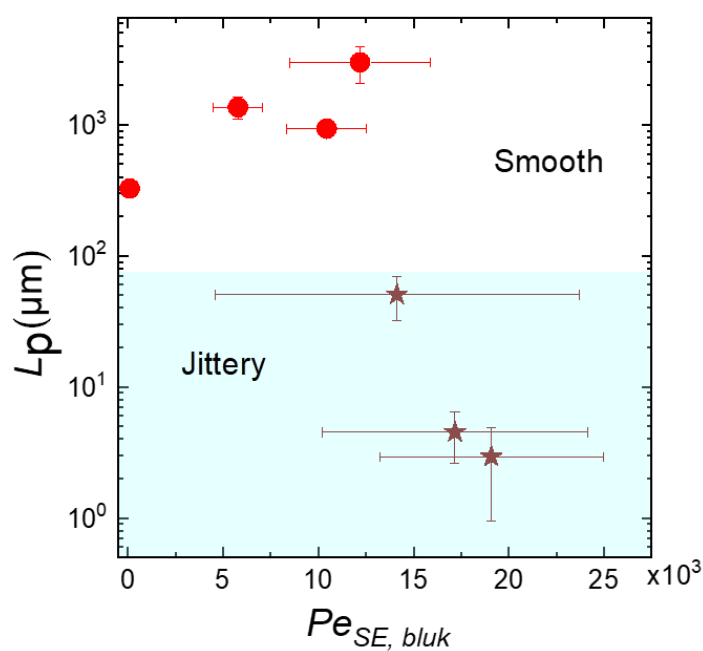

FIG. 1: Variation of persistence length ( $L_p$ ) with Péclet number ( $Pe_{SE, bulk}$ ) obtained using micelle diffusivity calculated via the Stokes-Einstein relationship with bulk phase viscosity ( $\eta_b$ ).
